# Supplementary material
Source: ML conference proceedings conference paper supplement (https://proceedings.mlr.press/v37/benavoli15.html)
Supplement: Supplementary file [file benavoli15-supp.pdf]

---

# Supplementary material

## A Bayesian nonparametric procedure for comparing algorithms

---

### 1. Proof of Theorem 1

A probability measure sampled from the posterior DP (9) has the following form:

$$P = w_0 P_0 + \sum_{j=1}^n w_j \delta_{\mathbf{X}_j},$$

with  $P_0 \sim Dp(s, \alpha^*)$ . Let us consider  $E[R(X_m)]$  w.r.t.  $P$ , we have that

$$E[R(X_i)] = w_0 R_{m0} + \sum_{j=1}^n w_j R_{mj} = w_0 R_{m0} + \mathbf{R}_m^T \mathbf{w},$$

where  $R_{m0} = \int \sum_{k=1}^{m-1} I_{\{X_m > X_k\}}(\mathbf{X}) dP_0(\mathbf{X})$ ,  $R_{mj} = \sum_{k=1}^{m-1} I_{\{X_{mj} > X_{kj}\}} + 1$  and  $\mathbf{R}_m^T = [R_{m1}, \dots, R_{mn}]$ . Assuming  $P_0 = \alpha^* = \delta_{\mathbf{x}}$ , we have that  $R_{m0} = \int \sum_{k=1}^{m-1} I_{\{X_m > X_k\}}(\mathbf{X}) d\alpha^*(\mathbf{X})$ . By defining the vector  $\mathbf{R}_0 = [R_{11}, \dots, R_{m0}]^T$  and the matrix  $\mathbf{R}$  whose rows are the vectors  $\mathbf{R}_m^T$ , we obtain (15).

Since the weights are Dirichlet distributed  $(w_0, \mathbf{w}^T) \sim Dir(s, 1, 1, \dots, 1)$ , it follows that

$$\mathcal{E} [E[R(X_1), \dots, R(X_m)]^T] = E_{Dir}[w_0 \mathbf{R}_0 + \mathbf{R} \mathbf{w}]$$

where the r.h.s. expected value is taken w.r.t. the Dirichlet distribution above. From  $E_{Dir}[w_0] = s/(s+n)$  and  $E_{Dir}[w_i] = 1/(s+n)$  for  $i > 0$ , we obtain the mean vector  $\boldsymbol{\mu}$  in (16). The covariance matrix can be obtained in a similar way by computing  $E_{Dir}[w_0^2]$ ,  $E_{Dir}[\mathbf{w}^T w_0]$ ,  $E_{Dir}[\mathbf{w} \mathbf{w}^T]$  etc..

### 2. Proof of Theorem 2

From (13) we can write

$$\begin{aligned} & \mathcal{P} [P(X_2 > X_1) + \frac{1}{2}P(X_2 = X_1) > \frac{1}{2}] \\ &= P_{Dir} [w_0 (P_0(X_2 > X_1) + \frac{1}{2}P_0(X_2 = X_1)) \\ & \quad + \sum_{i=1}^n w_i H(X_{2i} - X_{1i}) > \frac{1}{2}] \\ &= P_{Dir} [\frac{w_0}{2} + \sum_{i=1}^n w_i H(X_{2i} - X_{1i}) > \frac{1}{2}], \end{aligned} \quad (1)$$

where we have used the fact that  $\alpha^* = \delta_{X_1=X_2}$  and thus  $P_0(X_2 = X_1) = 1$ . By denoting with  $\theta_t = w_0 +$

$\sum_{i=1}^n w_i I_{\{X_{2i}=X_{1i}\}}$ ,  $\theta_g = \sum_{i=1}^n w_i I_{\{X_{2i}>X_{1i}\}}$  and  $\theta_l = 1 - \theta_t - \theta_g$ , and considering a partition of the space  $\mathbb{X}$  of the form  $B_0 = \{(X_2, X_1) : X_2 = X_1\}$ ,  $B_g = \{(X_2, X_1) : X_2 > X_1\}$  and  $B_l = \{(X_2, X_1) : X_2 < X_1\}$  it can easily be verified that  $\boldsymbol{\theta} = (\theta_t, \theta_g, \theta_l)$  has a Dirichlet distribution with parameters  $(s + n_t, n_g, n - n_t - n_g)$ . Then we have

$$\begin{aligned} & P_{Dir} [\frac{w_0}{2} + \sum_{i=1}^n w_i H(X_{2i} - X_{1i}) > \frac{1}{2}] \\ &= P_{Dir} [\frac{1}{2} (w_0 + \sum_{i=1}^n w_i I_{\{X_{2i}=X_{1i}\}} \\ & \quad + \sum_{i=1}^n w_i I_{\{X_{2i}>X_{1i}\}} > \frac{1}{2})] \\ &= \int I_{\{0.5\theta_t + \theta_g > 0.5\}}(\boldsymbol{\theta}) \\ & \quad Dir(\boldsymbol{\theta}; s + n_t, n_g, n - n_t - n_g) d\theta_t d\theta_g \\ &= K_1 \int_0^1 d\theta_t \int_{0.5(1-\theta_t)}^1 \theta_t^{s+n_t-1} \theta_g^{n_g-1} \\ & \quad (1 - \theta_t - \theta_g)^{n-n_t-n_g-1} d\theta_g, \end{aligned} \quad (2)$$

where  $K_1 = \frac{\Gamma(n+s)}{\Gamma(s+n_t)\Gamma(n_g)\Gamma(n-n_t-n_g)}$ . By the change of variables  $\theta'_g = \frac{\theta_g}{1-\theta_t}$  we obtain

$$\begin{aligned} & P_{Dir} [\frac{w_0}{2} + \sum_{i=1}^n w_i H(X_{2i} - X_{1i}) > \frac{1}{2}] \\ &= K_1 \int_0^1 \theta_t^{s+n_t-1} (1 - \theta_t)^{n-n_t-1} d\theta_t \\ & \quad \int_{0.5}^1 (\theta'_g)^{n_g-1} (1 - \theta'_g)^{n-n_t-n_g-1} d\theta'_g \\ &= K_1 K_2 K_3 \int_{0.5}^1 Beta(\theta; n_g, n - n_t - n_g) d\theta, \end{aligned} \quad (3)$$

where  $K_2 = \frac{\Gamma(n-n_t)\Gamma(s+n_t)}{\Gamma(s+n)}$  and  $K_3 = \frac{\Gamma(n_g)\Gamma(n-n_t-n_g)}{\Gamma(n)}$ . This proves the theorem, since  $K_1 K_2 K_3 = 1$ .

### 3. Matrix of the ranks of Example 1

Table 1 gives the ranks in  $n = 30$  datasets of the four algorithms in Example 1.

110 165  
 111 166  
 112 167  
 113 168  
 114 169  
 115 170  
 116 171  
 117 172  
 118 173  
 119 174  
 120 175  
 121 176  
 122 177  
 123 178  
 124 179  
 125 180  
 126 181  
 127 182  
 128 183  
 129 184  
 130 185  
 131 186  
 132 187  
 133 188  
 134 189  
 135 *Table 1. Ranks of the algorithms in Example 1.* 190  
 136 

|       |   |   |   |   |   |   |   |   |   |   |   |   |   |   |   |   |   |   |   |   |   |   |   |   |   |   |   |   |   |   |   |
|-------|---|---|---|---|---|---|---|---|---|---|---|---|---|---|---|---|---|---|---|---|---|---|---|---|---|---|---|---|---|---|---|
| $X_1$ | 4 | 4 | 4 | 4 | 4 | 3 | 3 | 3 | 3 | 3 | 4 | 4 | 4 | 4 | 4 | 3 | 3 | 3 | 3 | 3 | 2 | 2 | 2 | 2 | 4 | 4 | 3 | 3 | 4 | 3 |   |
| $X_2$ | 3 | 3 | 3 | 3 | 3 | 4 | 4 | 4 | 4 | 4 | 2 | 2 | 2 | 2 | 2 | 2 | 2 | 2 | 2 | 2 | 3 | 3 | 4 | 4 | 3 | 3 | 4 | 4 | 2 | 2 |   |
| $X_3$ | 2 | 2 | 2 | 2 | 2 | 2 | 2 | 2 | 2 | 2 | 3 | 3 | 3 | 3 | 3 | 4 | 4 | 4 | 4 | 4 | 4 | 4 | 4 | 3 | 3 | 1 | 1 | 1 | 1 | 1 |   |
| $X_4$ | 1 | 1 | 1 | 1 | 1 | 1 | 1 | 1 | 1 | 1 | 1 | 1 | 1 | 1 | 1 | 1 | 1 | 1 | 1 | 1 | 1 | 1 | 1 | 1 | 1 | 2 | 2 | 2 | 2 | 3 | 4 |

  
 137 192  
 138 193  
 139 194  
 140 195  
 141 196  
 142 197  
 143 198  
 144 199  
 145 200  
 146 201  
 147 202  
 148 203  
 149 204  
 150 205  
 151 206  
 152 207  
 153 208  
 154 209  
 155 210  
 156 211  
 157 212  
 158 213  
 159 214  
 160 215  
 161 216  
 162 217  
 163 218  
 164 219
